# Supplementary material for: Enhanced piezoelectricity and reduced leakage current of a novel (1 − x)Bi0.5Na0.5TiO3–x(Sr0.7Bi0.2□0.1)TiO3 thin film
Source: Royal Society of Chemistry journal article supplement (doi:10.1039/d0qi01169j), 2020-11-18
Supplement: d0qi01169j1.pdf [file d0qi01169j1.pdf]

**Enhanced piezoelectricity and reduced leakage current of a  
novel  $(1-x)\text{Bi}_{0.5}\text{Na}_{0.5}\text{TiO}_3-x(\text{Sr}_{0.7}\text{Bi}_{0.2}\square_{0.1})\text{TiO}_3$  thin film**

**Liuxue Xu, Shuanghao Wu, Kun Zhu, Baijie Song, Xiaofeng Zhou, Hao Yan, Bo Shen, Jiwei**

**Zhai\***

Shanghai Key Laboratory for R&D and Application of Metallic Functional Materials,  
Functional Materials Research Laboratory, School of Materials Science and  
Engineering, Tongji University, Shanghai 201804, China

\*Corresponding author: Jiwei Zhai. E-mail address: apzhai@tongji.edu.cn

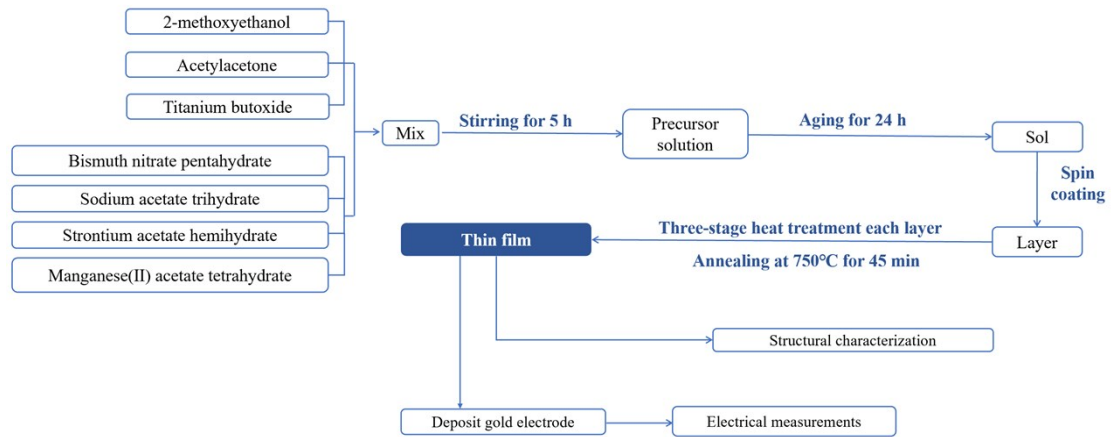

Fig S1 The schematic flow chart for the thin film synthesis

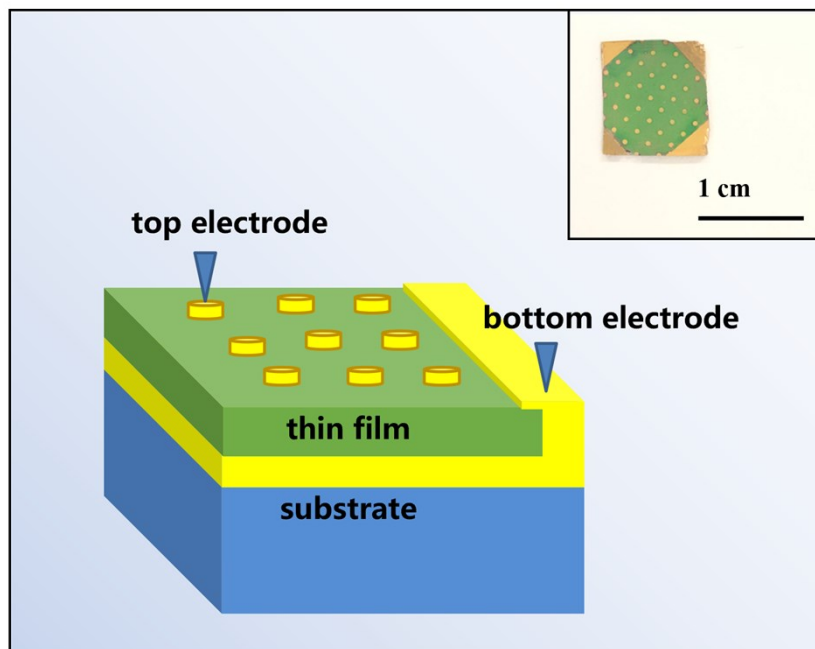

Fig S2 The schematic of the sandwich structure capacitor, the inset shows the real picture of thin film sputtered Au electrode on Pt/Ti/SiO<sub>2</sub>/Si substrate

Table S1 The chemicals quantity of all samples

| Quantity<br>Chemicals         | Samples   |           |           |           |
|-------------------------------|-----------|-----------|-----------|-----------|
|                               | $x = 0.0$ | $x = 0.1$ | $x = 0.2$ | $x = 0.3$ |
| $C_3H_8O_2$                   | 9.6074    | 9.6074    | 9.6074    | 9.6074    |
| $C_5H_8O_2$                   | 5.0566    | 5.0566    | 5.0566    | 5.0566    |
| $Ti[O(CH_2)_3CH_3]_4$         | 8.5950    | 8.5950    | 8.5950    | 8.5950    |
| $Bi(NO_3)_3 \cdot 5H_2O$      | 6.7371    | 6.3329    | 5.9286    | 5.5244    |
| $Na(OOCCH_3) \cdot 3H_2O$     | 1.8900    | 1.7010    | 1.5120    | 1.3230    |
| $Sr(OOCCH_3)_2 \cdot 0.5H_2O$ | 0.0000    | 0.3834    | 0.7669    | 1.1503    |
| $Mn(OOCCH_3)_2 \cdot 4H_2O$   | 0.0619    | 0.0619    | 0.0619    | 0.0619    |

100 mL precursor solution (0.25 mol/L)
